# Supplementary material for: Investigations on boron levels in drinking water sources in China
Source: Springer Nature journal article supplement (doi:10.1007/s10661-009-0923-8), 2009-05-14

JOURNAL OF PREVENTIVE MEDICINE  
2008; 16(1-2): 77-84

## ESTIMATION OF BORON CONCENTRATION IN SOME DRINKING WATER SAMPLES OF RURAL AREAS

Diana Diaconu<sup>1</sup>, V Nastase<sup>1</sup>, Mara-Mihaela Nănu<sup>2</sup>, O Nechifor<sup>3</sup>, Elena Nechifor<sup>1</sup>

1. University of Medicine and Pharmacy „Gr.T.Popa” Iași, România
2. Liceal College Craiova, România
3. University of Agronomy and Veterinary Medicine Iași, România

**Abstract. Aim.** Significant risks for human health may result from exposure to non pathogenic toxic contaminants that are often globally ubiquitous in waters from which drinking water is derived. In Moldova's rural areas (România) the wells are important water sources for the population. **Material and methods.** We have investigated the level of boron (B) in relation with other chemical parameters of water quality in 60 samples from 8 districts from Moldova (North-East România) in the period of 2005-2006 (nitrate, chloride, calcium, magnesium, total hardness, sodium, potassium, bicarbonate). **Results.** We have found out that the level of boron are below Romanian's sanitary norm, but there were noticed that well waters are polluted with nitrate. **Conclusions.** The presence of boron in drinking water sources in this territory is of natural origin. Thus, there is not a problem of aquifer pollution with boron.

**Key words:** boron, well water

**Rezumat. Scop.** Un risc semnificativ pentru sănătatea umană poate rezulta în urma expunerii la contaminanți chimici nepatogeni care sunt, de multe ori, ubiquitari în sursele din care provine apa de băut. În zonele rurale ale Moldovei (România) fântânile sunt surse importante de apă pentru populație. **Material și metodă.** Noi am investigat nivelul borului (B) în relație cu alți parametri chimici de calitate ai apei în 60 de probe prelevate din 8 județe ale Moldovei (Nord-Estul României) în perioada 2005-2006 (nitrați, cloruri, calciu, magneziu, duritate totală, sodiu, potasiu, bicarbonați). **Rezultate.** Am constatat că nivelul borului este inferior normei sanitare din România, dar am observat că apa din fântâni este poluată cu nitrați. **Concluzii.** Prezența borului în sursele de apă din acest teritoriu este de origine naturală, astfel încât nu poate fi vorba despre o poluare a acviferului cu bor.

**Cuvinte cheie:** bor, apă de fântână

### INTRODUCTION

Water quality of wells, important drinking water sources in rural areas is monitored by Public Health Authorities. Chemical and microbiological quality of these sources is often inadequate because water is not treated and/or the pollution sources, especially from agriculture and zootehny, are multiple. The hydro-geological condition and the

climate changes can influence the quality of aquifers and, in strong connection, the population general health.

The Law 458/2002 (in conformity with Directive 98/83/ECC) stipulated Maximum Allowable Concentration for boron (B) which is present especially in ground water (1, 2).

As long as this aspect has not been well studied, we have proposed to investigate the level of boron from some individual sources (wells) from the rural areas in Moldova (Iași, Vaslui, Suceava, Bacău, Neamț, Vrancea, Galați and Botoșani districts).

#### MATERIAL AND METHODS

The samples of water coming from wells have been sampled in glass bottles (1 liter) for the chemical parameters determinations and in polyethylene bottles for boron determinations. The principle of spectrophotometric method with H-azomethine for determination of boron is the reaction of H-azomethine which is the product of acid H (8-amino-

naftil-1-ol-3,6-pirosulfuric) and salicilice aldehyde. In the presence of dissolved forms of borates, at pH=6, formation of yellow complex is take place, followed by the spectrophotometric measurements ( $\lambda = 415 \text{ nm}$ ).

For the calibration graph a stock solution of borate ( $\text{H}_3\text{BO}_4$ , 1 g/l) was used of which a calibration solution was prepared by dilution (1 ml = 0.1  $\mu\text{g}$  borate). A linear calibration was observed, followed by the calculation of the slope factor. The results are exprimated in mg B/l. Regression equation:  $y = 1.6921 x + 0.0029$ .  $R^2 = 0.9998$  (fig. 1).

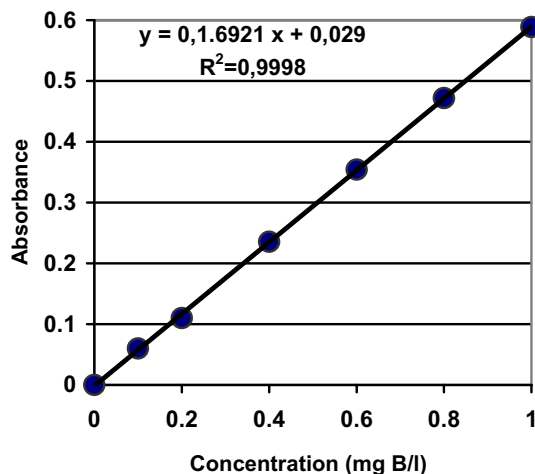

Fig. 1. The calibration graph – Boron

Calcium and magnesium were determined by EDTA titrimetric method, chloride by argentometric titration using standard silver nitrate as

reagent with potassium dichromate as the indicators.

Bicarbonate ( $\text{HCO}_3^-$ ) was estimated by titration to pH = 4.5 with 0.10 M HCl,

## ESTIMATION OF BORON CONCENTRATION IN SOME DRINKING WATER

nitrate by colorimetry using phenolic-disulfonic acid and sodium and potassium using flame photometry. Were collected and analyzed the well waters from 8 districts of Moldova (Romania) rural territories between 2005 and 2006 period. Each sample was run in duplicate and the mean of two successive results at the relative standard deviation not exceeding 5% were accepted as an estimation value. Statistical analysis was performed using Statistical Functions for Excel packages.

### RESULTS AND DISCUSSIONS

#### ***General aspects regarding boron and its compounds***

Boron (B) is a ubiquitous element in rocks, soil and water. Boron forms compounds with oxygen, hydrogen, the halogens, nitrogen, phosphorus and carbon. It also forms organic compounds. It is most commonly used in its compounds, especially borax ( $\text{Na}_2\text{B}_4\text{O}_7 \times 10 \text{H}_2\text{O}$ ) and boric acid ( $\text{H}_3\text{BO}_3$ ). Borate - mineral concentrates and refined products and sold worldwide.

Agriculturally, borates are used in fertilizer (4% of  $\text{BO}_3$ ) to correct trace boron deficiency in certain crops. Boron is one of the more important essential elements on plant growth high concentrations can be toxic to certain species. Borates and combinations of borates, with organic herbicides are used to control weeds. Insecticidal use of borates is attractive because of their low mammalian toxicity and lack of insect resistance compared with organic insecticides.

Sodium perborates [ $\text{NaBO}_3 \times \text{H}_2\text{O}$  or  $4 \text{H}_2\text{O}$ ] are true per salts traditionally have been blended into powdered detergents in Europe as bleaching agents (3).

Boric acid and borax were widely used in medicine the beginning of the century for therapeutic purposes locally as well orally (4).

A small group of boron (containing antibiotics), contain a single tetrahedral boron atom in the center of the structure, complexed with two vicinal dial groups. The first to be isolated and identified was *Bromicyl* from *Streptomyces antibioticus* (fig. 2).

From humans, boron exposure occurs primarily through the diet and drinking water. The mean global boron concentration in drinking water was considered to be between 0.1 and 0.3 mg B/l (5).

It is known biochemical and pharmacological effects of boron in plants, animals and humans. Zang and col. studies suggest that boron has a very important function in humans that involve macromineral and cellular metabolism at the cell membrane level (6).

Still another study today that boron compounds, while not carcinogenic or mutagenic, are poisonous to both animals and humans when ingested in highest concentrations.

On the other hand, it is also been shown that boron is essential to the body for a number of processes, including effective bone, lipid and mineral metabolism, proper immune system and brain function (7).

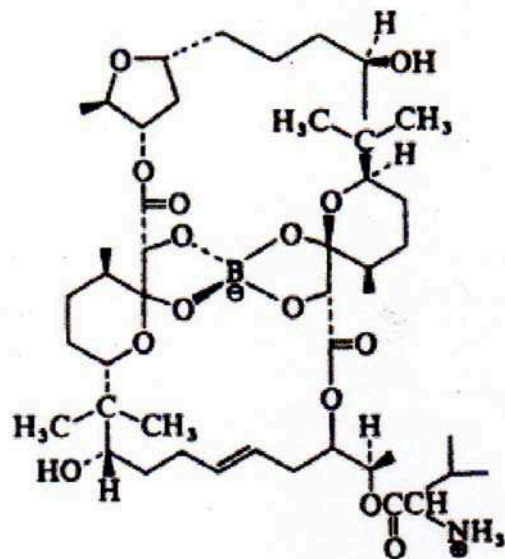

Fig. 2. Bromicyn

Findings from human experiments show that B is a dynamic trace element that can affect the metabolism or utilization of numerous substances involved in life processes, including calcium, copper, magnesium, glucose, triglycerides, reactive oxygen and estrogen (8).

Boron aids in the body's inflammatory functions and may therefore help to control and normalize the discomfort associated with unhealthy joints (9). Now, studies also conclude that boron may be the single most important in the prevention of prostate cancer (10).

#### ***Analytical methods used for boron determination***

In water, boron can be determined by several methods including the curcumin method: boron has to be transferred to boric acid or borates on reaction with

curcumin (diferuloylmethane –  $C_{21}H_{20}O_6$ ) in acidic solution, a red colored boron – chelate complex rosocyanine  $[B(C_{21}H_{19}O_6)_2Cl]$  is formed.

Carmine method, which involve combination with carmine or carminic acid in sulphuric acid are followed by photometric measurement. The curcumin method is recommended for water with boron concentrations between 0.1 and 1.0 mg/l whereas the carmine method is optimum for determination of boron level in the range of 1 – 10 mg/l (11).

Other analytical method includes spectrophotometric determination with azomethine – H and volumetric determination following distillation, for waters that contain more 0.2 mg/l boron and that are colored (12).

## ESTIMATION OF BORON CONCENTRATION IN SOME DRINKING WATER

In Romania, it is appreciate that approximately 7.4 millions of habitants (34.4%) from the century's population are using drinking water from their own sources (wells and springs). Frequently, the hygiene norms for these sources are not according to the conditions stipulated in Law 458/2002 (1).

We should stress that even now, the water contamination of wells with nitrate and other chemical compounds toxic potentially is taking place.

A total of 80 wells were sampled and examined for boron content and other quality parameters (chloride, alkalinity, calcium, magnesium, sodium, potassium, bicarbonates, nitrate, total hardness).

Several regulatory agencies from world have set or plan to set drinking water guidelines or standards for boron (13).

Table 1 shows the limits for this non metallic element in comparison with Romanian sanitary norm.

**Table 1. Norms for boron in drinking water**

| Boron concentration in drinking water (mg/l) | WHO | European Community | USA | Canada | Australia | Romania |
|----------------------------------------------|-----|--------------------|-----|--------|-----------|---------|
|                                              | 0.5 | 1.0                | NL  | 5.0    | 0.3       | 1.0     |

NL – no limit listed

Our investigations revealed that, in the Moldova territory, the boron concentration was situated, in generally, below at the Maximum Allowable

Concentration (minimum value 0.02 mg/l and maximum value 1.55 mg/l) (tab. 2).

**Table 2. Descriptive statistics for boron in the well waters**

| Districts | Min   | Max  | Mean  | SD    | SE    | Variance | Mediane | Range |
|-----------|-------|------|-------|-------|-------|----------|---------|-------|
| Botoșani  | 0.020 | 1.10 | 0.327 | 0.368 | 0.116 | 0.136    | 0.20    | 1.08  |
| Suceava   | 0.050 | 1.10 | 0.500 | 0.436 | 0.138 | 0.190    | 0.28    | 1.05  |
| Iași      | 0.020 | 1.55 | 0.540 | 0.470 | 0.119 | 0.326    | 0.40    | 1.53  |
| Bacău     | 0.030 | 1.10 | 0.390 | 0.454 | 0.143 | 0.206    | 0.08    | 1.07  |
| Vaslui    | 0.035 | 1.21 | 0.294 | 0.349 | 0.110 | 0.122    | 0.16    | 1.17  |
| Vrancea   | 0.025 | 1.20 | 0.650 | 0.426 | 0.134 | 0.182    | 0.77    | 1.12  |
| Neamț     | 0.131 | 1.25 | 0.380 | 0.409 | 0.123 | 0.168    | 0.14    | 1.22  |
| Galați    | 0.133 | 0.45 | 0.159 | 0.132 | 0.040 | 0.017    | 0.11    | 0.41  |

Well waters with high mineral content and highest concentration values of boron have been taken into consideration.

Because water is an excellent solvent it can contain lots of dissolved chemicals. Since ground water moves through rocks and substance soil, it has a lot of opportunity to dissolve substances as it moves, such as magnesium, calcium, chlorides, other macro and microelements. The quantity of minerals found in water supply, depend mainly on the types of rocks or soil the water comes into contact with, and the amount of water lost to evaporation relative to precipitation addition.

A high mineral concentration can restrict the use of water, depending on the specific mineral present and their individual concentration.

Also, the quality of ground water can register changes as the result of the mixing of water different aquifers. In aquifers affected by human activity, the quality of water can be directly affected by the infiltration of anthropogenic compounds or indirectly affected by alteration of flow paths or geochemical conditions.

In the water with high concentrations of boron were revealed nitrates ( $\text{NO}_3^-$ ) of anthropogenic origin, probably because of intensive agriculture in this territory. In the water samples, of rural areas, the concentrations of nitrate ranged between 6.8 and 344.5 mg  $\text{NO}_3^-/\text{l}$  (Neamț district). The nitrate values were prepared by box-plot method (9).

Figure 3 shows the levels of this pollutant in investigated well waters of six districts of Moldova.

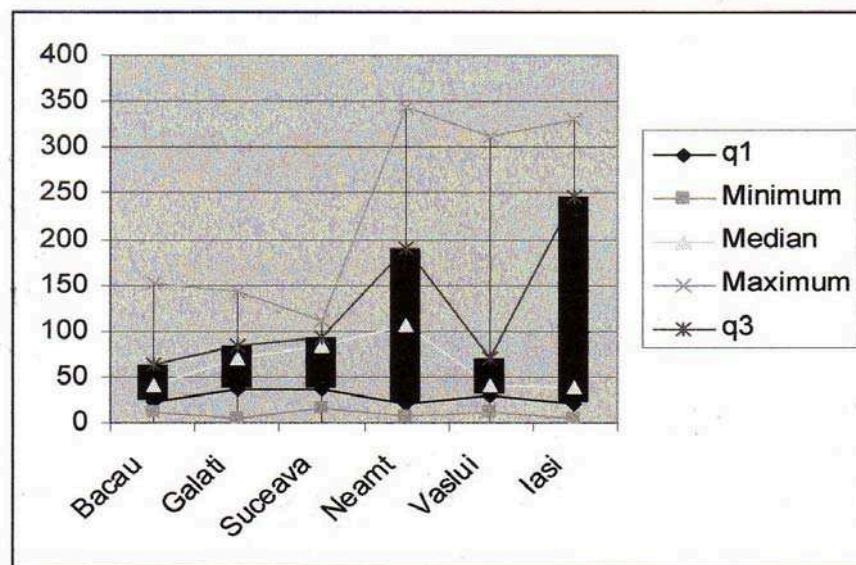

Fig. 3. Interquartile range of nitrate (mg/l) in well waters from rural areas

## ESTIMATION OF BORON CONCENTRATION IN SOME DRINKING WATER

In Iași district there was registered a concentration of about 50 mg NO<sub>3</sub><sup>-</sup>/l within a lot of 75% (q3) of water samples.

The following concentration criteria were used to identify if nitrate in well waters could be of anthropogenic origin or not:

- nitrate in concentration less than 0.9 mg/l indicated background level;
- nitrate concentration between 0.9 and 13.5 mg/l representing transition level;
- nitrate concentration > 13.5 mg/l showing an eventual human influence on water quality.

The high chloride content is generally considered as an index of impurity of ground water. In some wells, the matter contains chloride in high concentrations that exceeded Romanian's norm (250 mg/l).

Correlation analysis between the principal components was examined to find out possible relationships among these parameters of ground water samples. Table 3 shows the concentrations between the water quality parameters for well waters from rural localities (Prisecani, Iași district).

**Table 3. Correlation analysis between water quality parameters**

|                | Boron  | Nitrate | Chloride | Total hardness | Calcium | Magnesium | Bicarbonates | Fluorine |
|----------------|--------|---------|----------|----------------|---------|-----------|--------------|----------|
| Boron          | 1      |         |          |                |         |           |              |          |
| Nitrate        | 0.871  | 1       |          |                |         |           |              |          |
| Chloride       | -0.354 | -0.294  | 1        |                |         |           |              |          |
| Total hardness | 0.607  | 0.304   | 0.157    | 1              |         |           |              |          |
| Calcium        | -0.183 | -0.247  | 0.286    | 0.350          | 1       |           |              |          |
| Magnesium      | 0.875  | 0.555   | -0.287   | 0.678          | -0.060  | 1         |              |          |
| Bicarbonates   | 0.374  | 0.153   | -0.882   | 0.044          | -0.079  | 0.425     | 1            |          |
| Fluorine       | 0.296  | 0.282   | 0.042    | -0.199         | -0.786  | 0.332     | -0.122       | 1        |

The boron is high correlated with nitrate ( $R^2 = 0.871$ ), total hardness ( $R^2 = 0.607$ ) and magnesium ( $R^2 = 0.875$ ). No significant correlations between boron and bicarbonates, boron and fluorine, nitrate and bicarbonates, calcium and chloride we founded.

### CONCLUSIONS

- Well waters are used for drinking purpose in many rural localities in rural areas of Moldova territory.
- The analytical results of chemical water analysis revealed the presence of boron in the limit of Law

458/2002, with a variation between 0.002-1.55 mgB/l.

- Another important aspect is the high concentrations of nitrate that exceed 50 mg/l in more than half of the well sampled.
- In general, well waters within the investigated areas, are highly mineralized. They contain chloride, bicarbonate as total hardness. Calcium and magnesium registered high levels in some wells.
- The correlation analysis revealed the strong positive association between boron and some chemical compounds in drinking water.
- Access to safe drinking water is essential to human wellbeing and is a key public health issue.

The maintenance of good quality of drinking water is achieved both by protecting the raw water supply and water treatment. It is possible to protect the raw waters supply by means of pollution control measures that prevent undesirable constituents from entering the water and by good watershed management practices.

#### REFERENCES

1. xxx: Low 452/2002: *Drinking water for human consumption*.
2. xxx: *Health Effect Support Occurement for Boron*. MS Environmental Production Agency. Document Number EPA-821-R-06-005, 2006.
3. Weir RJ, Fisher RS: *Toxicological studies on borax and boric acid*. Toxicol and Pharmacol, 1972, 25: 251-256.
4. Zang ZF, Winton MS, Rainly C: *Boron 19 associate with decreased risk of human prostate cancer*. FASEB Journal, 2001, 95: A-1089.
5. Woods WG: *An introduction to boron: History, sources, uses and chemistry*. Environ Health Perspect 102, Supplim.7, 1994: 5-11.
6. Newnham RE: *Arthritis or skeletal fluorosis and boron*. Int Clin Nutri Rev, 1991, 11: 68-70.
7. Yazbleck C, Kloppmann W, Cottier R: *Health impact evaluation of boron in drinking water: a geographical assessment in Northern France*. Environ. Geochem Health 2005, 27(5-6): 419-427.
8. Nilsen FN: *Boron echances and mimics some effects of oestrogen therapy in postmenopausal women*. J Trace Elements in experimental medicine, 1992, 5: 237-246.
9. Newnham RE: *Essentiality of boron for healthy bones and joints*. Environ Health Perspect, 1994, 102: 83-85.
10. Simson RJ, Timothy AJ, Amara JA: *The box-plat. An exploratory analysis graph for biomedical publications*, Am Heart, 1988, 116(6): 1663-1665.
11. Greenberg AF, Trusell RR, Clesecrin LS: *Standard method for the examination of water and wastewater*. 16<sup>th</sup> Edition American Public health Association, Washington DC, 1985.
12. Fressenins W, Quentin KE, Schneider W: *Water analysis a practical guide to physico-chemical, chemical and microbiological water examination and quality assurance*. Spring – Verlag, Berlin, 1988.
13. xxx: ALMARO MED Laboratory for analytical and control of the water quality. București.



# Spurenbestimmung von Bor in Oberflächengewässern und Trinkwässern

## Eine umfassende Untersuchung in der Bundesrepublik Deutschland

Von Gustav Graffmann, Peter Kuzel, Heinz Nösler und Gerhard Nonnenmacher\*

Aus den Laboratorien der Degussa und der Henkel & Cie. GmbH

Um einen Überblick über die Borkonzentration im Wasser der Bundesrepublik Deutschland und West-Berlins zu erhalten, wurden ca. 300 Oberflächengewässerproben und ca. 240 Trinkwässer auf ihren Borgehalt geprüft. – Sämtliche 110 untersuchten Rhein-Wasserproben sowie die meisten anderen untersuchten Gewässer wiesen Borgehalte bis zu maximal 0,25 mg B/l auf. Lediglich sehr kleine, aber extrem abwasserbelastete Vorfluter zeigten einen deutlich höheren Borgehalt. – Bei allen der 240 untersuchten Trinkwasserproben lagen die Borgehalte unter 0,25 mg B/l, in den meisten Fällen unter 0,1 mg B/l. – Ein Vergleich der von uns in Oberflächengewässern und Trinkwässern der Bundesrepublik gemessenen Borkonzentrationen mit Borkonzentrationen, die im Oberflächen-, Grund- und Trinkwasser anderer europäischer und außereuropäischer Länder ermittelt wurden, zeigt, daß die in der Bundesrepublik anzutreffenden Borkonzentrationen sich größtenteils im unteren unauffälligen Bereich bewegen. – Demgegenüber fanden wir in 11 von 25 untersuchten handelsüblichen Mineralwässern deutlich höhere Borkonzentrationen. Im Vergleich hierzu sind für zahlreiche Lebensmittel in der Literatur teilweise extreme Borgehalte beschrieben.

The boron concentration in about 300 samples of surface water and in about 240 samples of drinking water taken from places distributed all over the Federal Republic of Germany and West-Berlin have been determined. – All of the investigated 110 surface water samples from the river Rhine and samples from most of the other rivers had a boron concentration up to a maximum of 0.25 mg B/l. Only very small rivers which are known to transport a large amount of wastewater showed a significantly higher boron concentration. – None of the about 240 samples of drinking water had a higher boron concentration than 0.25 mg B/l. In most of the samples the boron concentration was less than 0.1 mg B/l. – The boron concentrations which we found in surface and drinking water of the Federal Republic of Germany are in the lower range as compared to boron concentrations which have been determined in surface water, ground water and drinking water of other European and of non-European countries. – In 11 of 25 mineral waters we measured however significantly higher boron concentrations. Furthermore evidence can be found in the literature that the boron concentration in some food can be extremely high.

### 1. Einleitung

Mit Einführung des deutschen Detergentiengesetzes wurden Anfang der 60er Jahre vom *Hauptausschuß „Detergentien“* regelmäßige Untersuchungen in westdeutschen Gewässern angeregt. Seit dieser Zeit werden in enger Zusammenarbeit zwischen Behörden, Wasser- und Abwasserverbänden sowie der Firma *Henkel* Wasseruntersuchungen durchgeführt.

Da in der heutigen Umweltdiskussion häufig Sachunterlagen fehlen, sind die Firmen *Degussa* und *Henkel* im Rahmen dieser routinemäßigen Abwasseruntersuchungen der Teilfrage nachgegangen, wie hoch der *Borgehalt in deutschen Oberflächengewässern und Trinkwässern* ist. Für den Bereich der Bundesrepublik waren bislang nahezu keine derartigen Angaben in der Literatur zu finden, während in anderen Ländern zumindest stichprobenartige Untersuchungen vorliegen [1–5].

### 2. Analytik

#### 2.1. Probennahme und Probenvorbereitung

Die zu untersuchenden *Wasserproben* wurden *überwiegend der Flußmitte entnommen*. Dabei wurde besonders die Probennahme „aus Fahnen“ von naheliegenden Abwasser-Einleitungsstellen vermieden. Bei extremen Wasserständen wurden keine Proben gezogen.

Stark verschmutzte Wässer wurden sofort filtriert. Alle Proben (jeweils ca. 1 l) wurden durch Zusatz einiger ml Chloroform konserviert und bis zur Untersuchung in Polyäthylenflaschen aufbewahrt.

Es ist wesentlich, daß nur *Gefäße aus Quarzglas oder Kunststoff* verwendet werden, da aus Glas sehr leicht mehr Bor extrahiert wird, als die Proben ursprünglich enthielten.

#### 2.2. Analysenverfahren

Zur Bestimmung von Bor im Spurenbereich sind viele Reagenzien bekannt [6, 7]. Für die nachfolgenden Untersuchungen wurden zwei *colorimetrische Analysenmethoden* ausgewählt, einmal die bekannte *Bestimmung mit Curcumin*, zum anderen die *Bestimmung mit Azomethin H*. Beide Reagenzien haben gegenüber anderen den Vorteil, daß die Messung nicht in 96%iger Schwefelsäure durchgeführt werden muß.

Versuche mit einer *emissionsspektralanalytischen Methode* (B-Linie bei 249,77 nm) mit Gold als innerem Standard (Au-Linie bei 242,79 nm) erwiesen sich als

\* Dr. Gustav Graffmann, Henkel & Cie. GmbH, Forschung und Entwicklung, 4 Düsseldorf, Postfach 1100.

Dr. Peter Kuzel, Degussa Wolfgang, Chemie-Anwendungstechnik, 645 Hanau, Postfach 602.

Dr. Heinz Nösler, Henkel & Cie. GmbH, Leitstelle Umweltschutz, 4 Düsseldorf, Postfach 1100.

Dr. Gerhard Nonnenmacher, Degussa Wolfgang, Forschung Chemie, 645 Hanau, Postfach 602.

Tabelle 1. Vergleich der Methoden zur colorimetrischen Bor-Bestimmung.

|                                                                                | Curcumin                                        | Azomethin H                                                                                         |                                                                                                           |
|--------------------------------------------------------------------------------|-------------------------------------------------|-----------------------------------------------------------------------------------------------------|-----------------------------------------------------------------------------------------------------------|
|                                                                                |                                                 | ohne Extraktion                                                                                     | mit Extraktion                                                                                            |
| mol. Ext. Koeff. ( $l \text{ mol}^{-1} \text{ cm}^{-1}$ )<br>bezogen auf Bor   | ca. 85 000                                      | ca. 6600                                                                                            | ca. 6600                                                                                                  |
| Meßwellenlänge (nm)                                                            | 540                                             | 415                                                                                                 | 415                                                                                                       |
| Meßbereich für die Meßlösungen                                                 | 0,02–3,0 $\mu\text{g B}/25 \text{ ml}^a$        | 2,5–250 $\mu\text{g B}/100 \text{ ml}$                                                              | 2,5–250 $\mu\text{g B}/100 \text{ ml}$                                                                    |
| Standardabweichung<br>bezogen auf die Originalprobe                            | 0,8 % relativ bei<br>1,00 mg B/l (N = 10)       | 0,8 % relativ bei<br>1,00 mg B/l (N = 10)                                                           | 1,6 % relativ bei<br>1,00 mg B/l (N = 10)                                                                 |
| Nachweisgrenze ( $3\sqrt{2} \sigma$ ) [19,20]<br>bezogen auf die Originalprobe | 0,014 mg B/l (N = 34)<br>bei 1 ml Probenvolumen | 2,70 $\mu\text{g B}$ (N = 25)<br>im Probenvolumen,<br>d. h. 0,054 mg B/l<br>bei 50 ml Probenvolumen | ca. 5 $\mu\text{g}$ (geschätzt)<br>im Probenvolumen,<br>d. h. ca. 0,01 mg B/l<br>bei 500 ml Probenvolumen |

<sup>a</sup> bei Schichtdicken bis 5 cm

aufwendiger und weniger genau als die oben genannten colorimetrischen Methoden.

### 2.2.1. Curcumin-Methode

Die direkte Borbestimmung mit Curcumin wurde als „Standardmethode“ der American Public Health Association für Wasser und Abwasser ohne Abänderung übernommen [8]. Die charakteristischen Kennzahlen dieses Verfahrens sind in Tabelle 1 aufgeführt.

### 2.2.2. Azomethin-H-Methode

Azomethin H ist ein erst seit kurzem bekanntes Reagenz für Bor, bei dem die Farbentwicklung in gepuffert wässriger Lösung erfolgt [9, 10]. Das Reagenz ist unter anderem vorgeschlagen worden für eine Borbestimmung in Komplex-Düngern [11]. Eine geprüfte Vorschrift zur Untersuchung von Wasser gibt es unseres Wissens bisher nicht.

Die Angaben in der Literatur [6, 9–11] über den optimalen pH-Wert und die Temperatur bei der Farbentwicklung sowie die erforderliche Wartezeit sind z. T. widersprüchlich. Aus diesem Grunde haben wir die oben genannten Versuchsparameter eingehend geprüft und optimiert. So ist es insbesondere günstiger, bei höheren pH-Werten als in der Literatur angegeben zu arbeiten (pH 5,9 statt 5,2), da sich das Komplexgleichgewicht dann schneller einstellt und eine Wartezeit von nur 1 Stunde (statt 2 bis 18 Stunden) ausreichend ist. Leider steigt mit wachsendem pH-Wert auch die Eigenabsorption des Reagenzes an, so daß einer Erhöhung des pH-Wertes Grenzen gesetzt sind. Der Temperatureinfluß ist gering, sofern die Meßlösung auf 6 bis 14 °C gebracht wird.

Von besonderer Bedeutung für reproduzierbare Analysen ist eine sehr konstante Reagenzkonzentration, da mit steigender Konzentration die Empfindlichkeit der Bestimmung zunimmt. In der Praxis läßt sich diese Forderung nur bedingt erfüllen, weil Azomethin H schwach hygroskopisch ist. Der Einfluß der Reagenzkonzentration und der anderen Parameter läßt sich jedoch in sehr einfacher Weise eliminieren, indem jeweils eine Eichprobe mit bekanntem Borgehalt zusammen mit den zu untersuchenden Proben analysiert wird. Diese Arbeitsweise ist möglich, weil die Eichkurve im Bereich von 0–2,5 mg B/l linear und durch den Koordinatenursprung verläuft. Ein Arbeiten mit einer einmal aufgestellten Eichkurve bringt größere Schwankungen und ist nicht empfehlenswert.

### 2.2.3 Abtrennung von Bor durch Extraktion

Die Borbestimmung mit Azomethin H ist nach Literaturangaben weitgehend selektiv, jedoch stören einige Elemente wie zum Beispiel Al(III) und Fe(III) [11]. Für eine sichere Bestimmung ist eine vorherige Abtrennung erforderlich; dies gilt in besonderem Maße auch für die Untersuchung stark gefärbter Abwässer. Bewährt hat sich die Extraktion mit verdünntem 2-Athyl-1,3-hexandiol (AHD) [11–13]. Ein Verdünnungsmittel mit größerer Dichte als Wasser ist hier vorteilhafter als eines mit geringerer Dichte, wie in der Literatur angegeben wird. Die interessierende organische Phase liegt dann unten. Wegen des nur mäßigen Verteilungskoeffizienten ist eine zweimalige Extraktion für eine fast vollständige Abtrennung erforderlich [13]. Geringe Verluste (ca. 2 %) werden durch einen Korrekturfaktor ausgeglichen. Nach Literaturangaben wird durch diesen Extraktionsschritt

Tabelle 2. Vergleich der colorimetrischen Verfahren unter Praxisbedingungen.

| Art des Wassers | aufgestockt mit | Borgehalt (mg/l) | Curcumin-Methode  |                         | Azomethin-H-Methode |                         |
|-----------------|-----------------|------------------|-------------------|-------------------------|---------------------|-------------------------|
|                 |                 |                  | B gefunden (mg/l) | Wiederfind.-Rate (in %) | B gefunden (mg/l)   | Wiederfind.-Rate (in %) |
| Dest. Wasser    | Borax           | 0,100            | 0,10              | 100                     | 0,11                | 110                     |
| Dest. Wasser    | Borax           | 0,248            | 0,24              | 97                      | 0,24                | 97                      |
| Dest. Wasser    | Borax           | 0,460            | 0,45              | 98                      | 0,46                | 100                     |
| Dest. Wasser    | Borax           | 6,790            | 6,72              | 99                      | 6,66                | 99                      |
| Dest. Wasser    | Perborat        | 4,710            | 4,63              | 98                      | 4,78                | 102                     |
| Rhein-Wasser    | –               | –                | 0,21              | –                       | 0,21                | –                       |
| Rhein-Wasser    | Borax           | 5,060            | 5,03              | 99                      | 4,96                | 98                      |
| Rhein-Wasser    | Perborat        | 6,860            | 6,64              | 97                      | 6,47                | 95                      |
| Wupper-Wasser   | –               | –                | 0,48              | –                       | 0,48                | –                       |
| Wupper-Wasser   | Borax           | 6,140            | 6,03              | 98                      | 6,08                | 101                     |
| Wupper-Wasser   | Perborat        | 7,630            | 7,58              | 99                      | 7,35                | 96                      |

auch der störende Einfluß von Fluorid beseitigt. Die Extraktion wurde nur in Kombination mit der Azomethin-H-Methode angewendet<sup>1)</sup>.

### 2.2.4. Vergleich der Methoden

Die Leistungsmerkmale der beiden Methoden und ihre statistischen Kenndaten sind in Tabelle 1 zusammengefaßt.

Daneben wurde auch ein Vergleich unter Praxisbedingungen durchgeführt. Dazu wurden sowohl destilliertes Wasser als auch stark belastetes Flußwasser mit Bor aufgestockt und nach beiden Verfahren parallel in unseren verschiedenen Laboratorien untersucht. Die dabei gefundenen Werte sind in Tabelle 2 zusammengefaßt.

Aufgrund der guten Übereinstimmung der Ergebnisse (trotz völlig unterschiedlicher Analysemethoden) sind systematische Fehler überaus unwahrscheinlich.

## 3. Bor in Oberflächengewässern

Von Januar 1973 bis Mai 1974 wurden von uns insgesamt

- ca. 300 Proben aus *Oberflächengewässern*,
- ca. 240 *Trinkwässer* und
- 25 handelsübliche *Mineralwässer*

auf ihren Borgehalt untersucht (siehe Tabelle 3).

In einigen Fällen, z. B. im Rhein auf der Höhe von Düsseldorf, Wesel und Emmerich, wurden Meßreihen über einen längeren Zeitraum durchgeführt.

Einen Überblick über die in den *Oberflächengewässern der Bundesrepublik ermittelten Borkonzentrationen* liefert die Abb. 1<sup>2)</sup>. Die in der Abbildung aufgeführten Zahlen kennzeichnen die Verteilung der Probennahmestellen; teilweise sind mehrere Probennahmestellen unter einer Nummer zusammengefaßt.

Die vorliegenden Ergebnisse gestatten folgende Aussagen:

Die Borkonzentrationen im Rhein, dem bedeutendsten Vorfluter der Bundesrepublik, liegen überwiegend zwischen 0,1 und 0,2 mg B/l. Der Neckar und der Main, beides stark abwasserbelastete Nebenflüsse des Rheins, weisen in ihrem mittleren und unteren Verlauf 0,2–0,3 mg B/l auf, während in der Ruhr nahe der Mündung die Borkonzentrationen in der Größenordnung von 0,4–0,5 mg B/l liegen.

Einige besonders kleine, aber sehr stark belastete Vorfluter, wie z. B. Nette, Nidda, Niers und Werse, weisen einen Borgehalt von 0,5–1 mg B/l auf, während in der Itter und im „Abwasserkanal“ Emscher Borkonzentrationen zwischen 1 und 2 mg B/l gefunden wurden.

Wenn auch die vorliegenden Ergebnisse keinen vollständigen Überblick über den Borgehalt in den

Tabelle 3. Verteilung der untersuchten Wasserproben.

| Gewässer                      | Probenzahl |
|-------------------------------|------------|
| Rhein                         | 110        |
| Neckar, Main und Ruhr         | 41         |
| Verschiedene Flüsse und Bäche | 101        |
| Seen, Talsperren und Kanäle   | 44         |

Tabelle 4. Borkonzentrationen in englischen Gewässern [5].

| Fluß    | Entnahmestelle | Borkonzentration (mg B/l) |
|---------|----------------|---------------------------|
| Tame    | Chetwynd       | 0,87                      |
| Trent   | Wychnor        | 0,51                      |
| Trent   | Walton         | 0,74                      |
| Trent   | Burton         | 0,76                      |
| Dove    | Monk's Bridge  | 0,30                      |
| Trent   | Willington     | 0,67                      |
| Trent   | Shardlow       | 0,66                      |
| Derwent | Wilne          | 0,28                      |
| Trent   | Sawley         | 0,59                      |

Oberflächengewässern der Bundesrepublik liefern, so zeigen sie doch, daß der *Borgehalt in unseren Gewässern relativ niedrig* liegt.

In vergleichbarer Größenordnung liegen Borkonzentrationen, die im Frühjahr 1972 im Mündungsbereich des Rheins in *Holland* ermittelt wurden [1]. Aus 17 untersuchten Proben ergab sich ein Durchschnittswert von 0,203 mg B/l; die Werte schwankten zwischen 0,105 mg B/l und 0,330 mg B/l.

In *England* sollen die Borkonzentrationen in Oberflächengewässern selten unter 0,3 mg B/l liegen [14]. Im Mittleren Trent-System wurden z. B. im Juni 1968 die in Tabelle 4 wiedergegebenen Werte ermittelt [5].

Im Januar 1970 wurden in *Schweden* zahlreiche Oberflächengewässer auf ihren Borgehalt untersucht. Dabei wurden Werte zwischen 0,001 mg B/l und 1,046 mg B/l gefunden [3].

Flußwasseruntersuchungen in *Wisconsin (USA)* ergaben Borkonzentrationen von 0,39–0,59 mg B/l; in Seen wurden Borgehalte von 0,07–0,37 mg B/l gemessen [2].

In *West-Kasachstan (UdSSR)* wurden in Oberflächengewässern und im Grundwasser Borgehalte von 1,8–15,7 mg B/l gefunden, in *Estland* 1,4–2,5 mg B/l und in manchen Bezirken des *Karpaten-Gebietes* bis zu 40 mg B/l [15].

## 4. Bor in Trinkwasser und in Mineralwässern

Je stärker bei der Trinkwassergewinnung auf Oberflächenwasser zurückgegriffen wird, um so dringender stellt sich grundsätzlich die Frage nach der Zusammensetzung des Trinkwassers. Da auch für diesen Bereich in der Bundesrepublik keine Angaben über den Borgehalt publiziert sind, haben wir ca. 240 Trinkwasserproben auf ihren Borgehalt untersucht. In allen Fällen handelte es sich um Trinkwasser aus der öffentlichen Trinkwasserversorgung, ohne daß jedoch der Ursprung des Wassers – ob aus Grund- oder aus Oberflächenwasser stammend – bekannt war.

Abb. 2 liefert einen geographischen Überblick über die untersuchten Wasserproben<sup>2)</sup>.

Das interessanteste Ergebnis der Untersuchung ist die Tatsache, daß *sämtliche Trinkwasserproben einen Borgehalt von weniger als 0,25 mg B/l* aufwiesen; in

<sup>1)</sup> Die Analysenvorschrift für die Borextraktion und die Azomethin-H-Methode wird aus Platzgründen nur in den Sonderdrucken der vorliegenden Veröffentlichung aufgeführt.

<sup>2)</sup> Das gesamte Zahlenmaterial der Untersuchung (Entnahmeort, Datum, Borgehalt) wird – tabellarisch geordnet – den Sonderdrucken beigelegt.

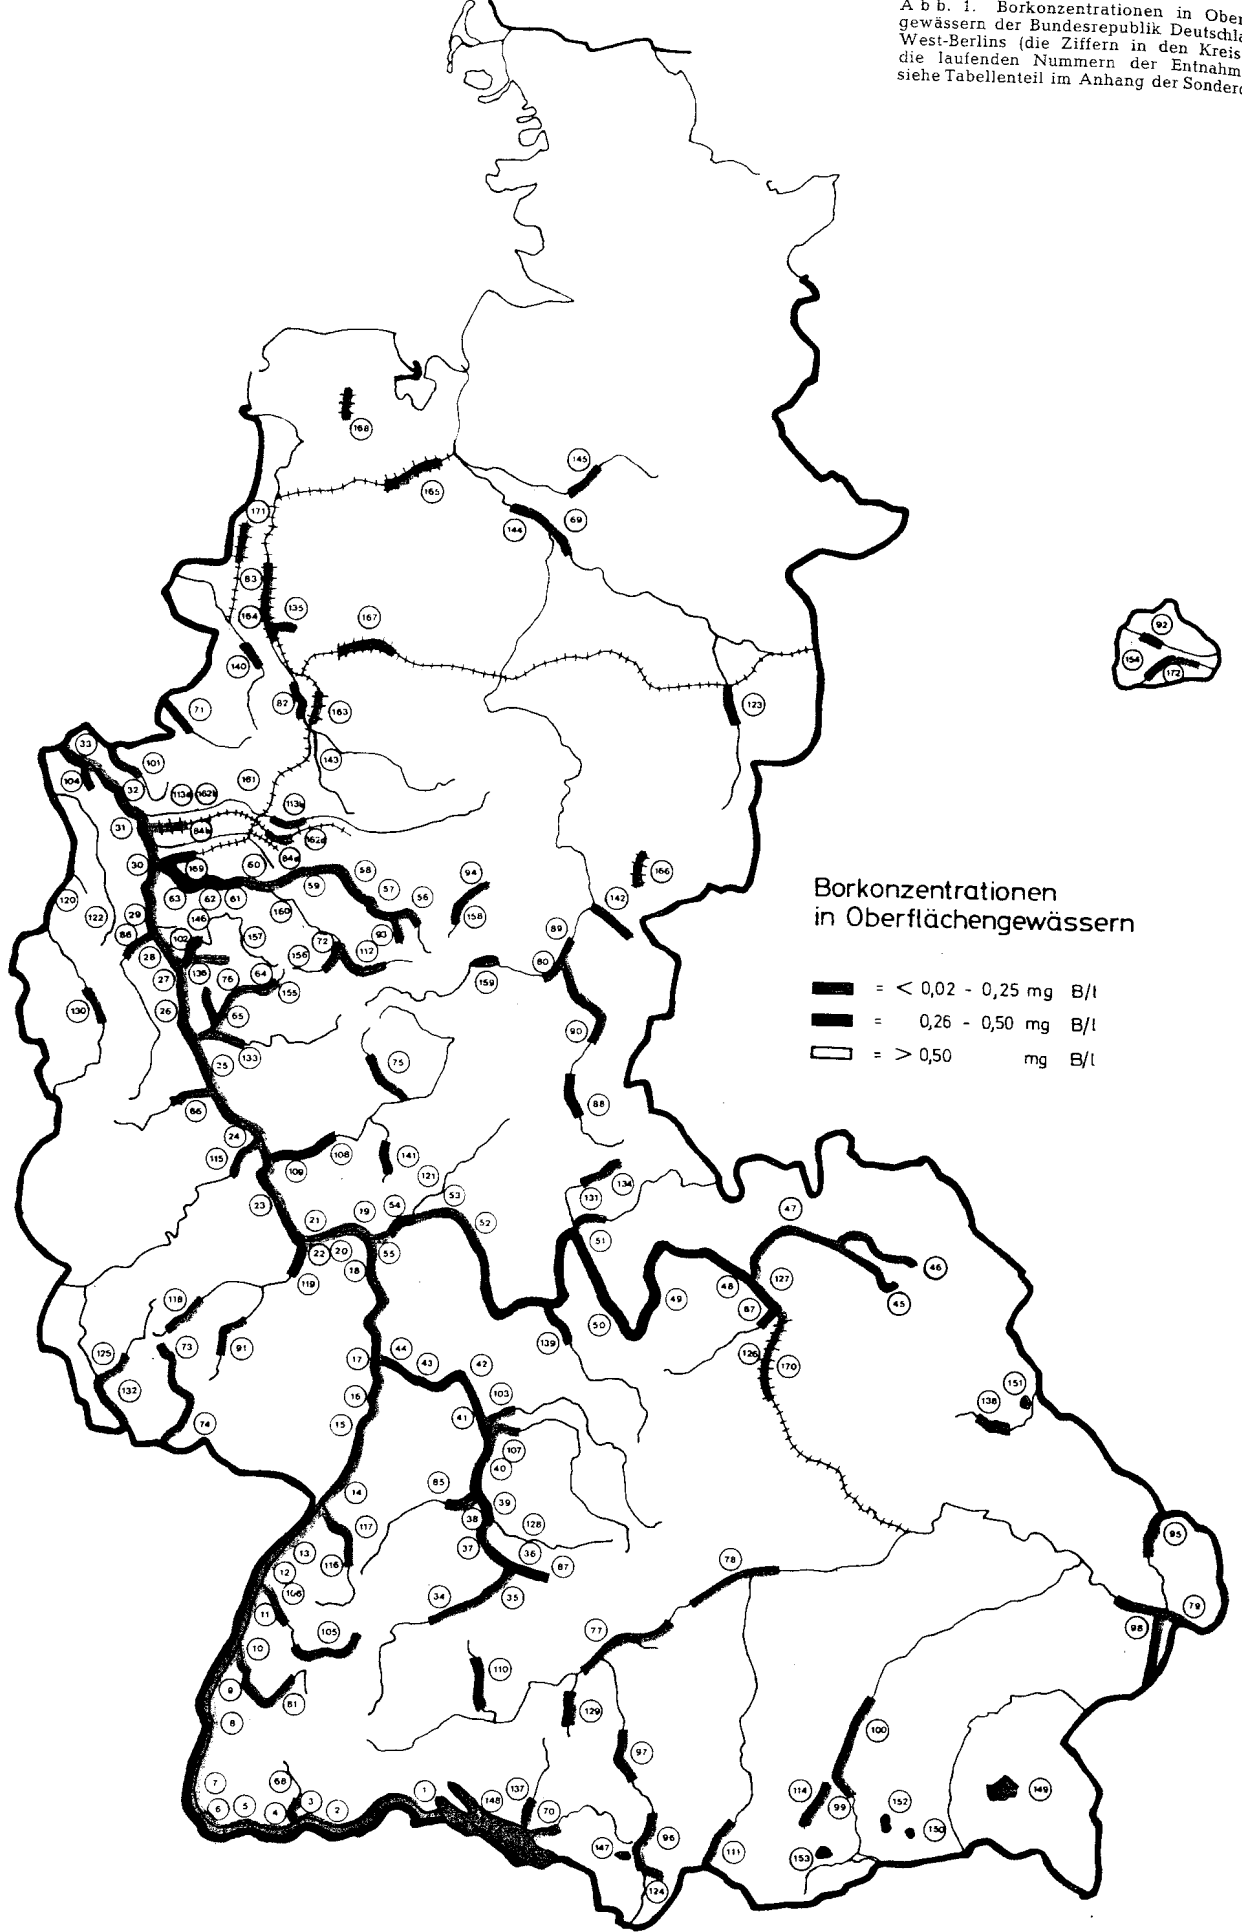

Abb. 2. Entnahmestellen von Trinkwässern (Die Ziffern in den Kreisen sind die laufenden Nummern der Entnahmeorte - siehe Tabellenteil im Anhang der Sonderdrucke).

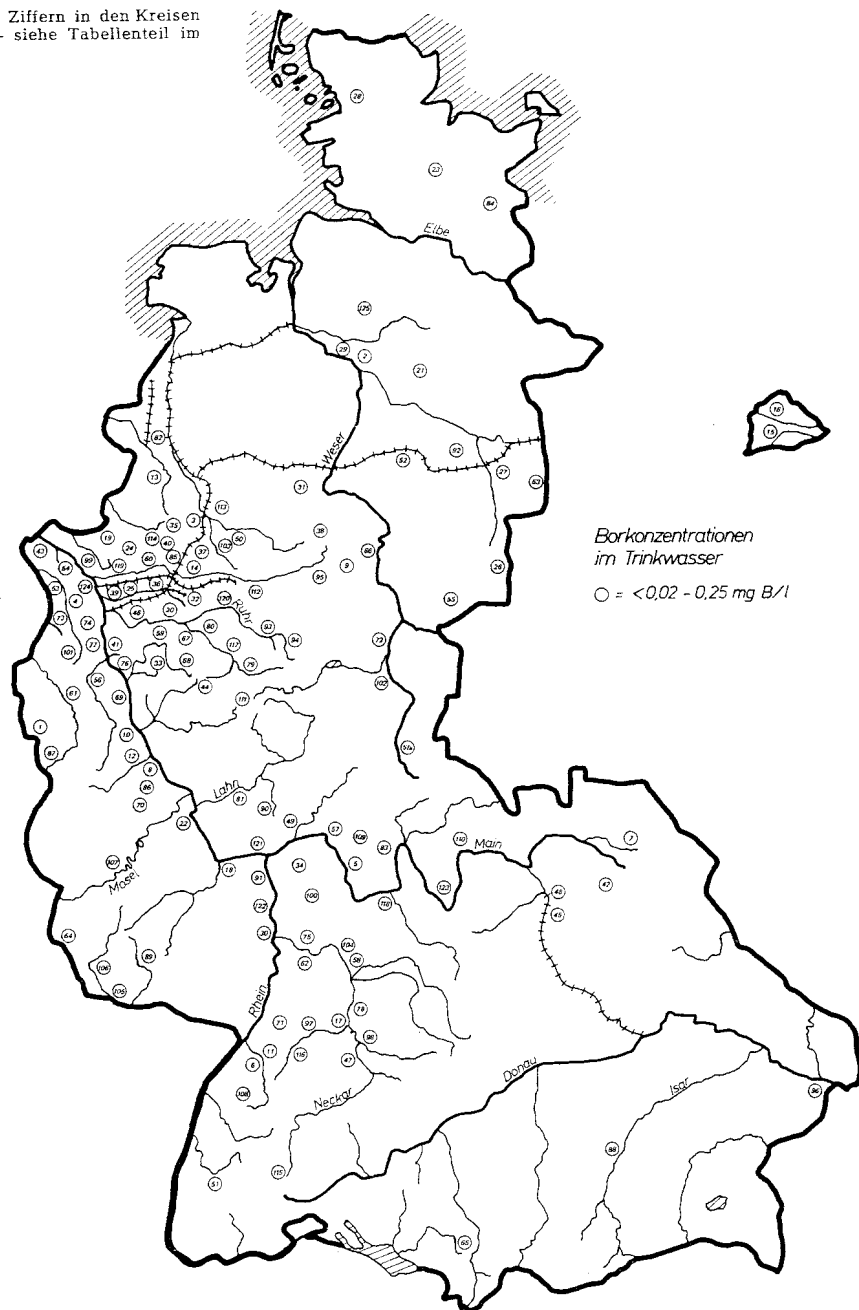

den meisten Orten lag die Borkonzentration unter 0,1 mg B/l.

Käufliche Mineralwässer enthalten dagegen teilweise deutlich mehr Bor. Bei 25 aus dem Handel bezogenen, von uns untersuchten Mineralwässern lag der Borgehalt zwischen  $< 0,02$  und 3,23 mg B/l; im Mittel bei ca. 0,5 mg B/l<sup>3)</sup>.

Während in der Schweiz der Borgehalt im Trinkwasser ebenfalls meistens unter 0,1 mg B/l liegt [4], gibt es zahlreiche Beispiele in der Literatur, daß Trinkwässer häufig höhere Borkonzentrationen aufweisen.

Ploquin [16] gibt z. B. für Nantes einen Borgehalt von 0,4–0,7 mg B/l an; im Brunnenwasser der Charentais-Region wurden sogar 0,5–2,0 mg B/l gefunden.

<sup>3)</sup> Das gesamte Zahlenmaterial der Untersuchung wird den Sonderdrucken tabellarisch geordnet beigelegt.

Heikkinen [2] fand bei Grundwasseruntersuchungen im Staate Wisconsin Borkonzentrationen von 0,32 bis 1,18 mg B/l.

Der Borgehalt in west-sibirischen Grundwasserproben lag zwischen 0,01 und 9,40 mg B/l, in Armenien bei 110 untersuchten Grundwasserproben zwischen 0,29 und 1,44 mg B/l; 38 % der untersuchten armenischen Grundwasserproben wiesen einen Borgehalt von  $0,41 \pm 0,02$  mg B/l auf [15].

In Lebensmitteln sind sehr unterschiedliche Borkonzentrationen gefunden worden. Dabei ist ein Wert von 920 mg B/kg Kaviar – wohl zum größten Teil aus der Konservierung stammend – sicherlich nicht von so großem Interesse, wie z. B. Extremwerte bis zu 350 mg B/kg Feldsalat, 250 mg B/kg Honig, 160 mg B/kg Erdbeeren, 110 mg B/kg Apfel, 87 mg B/kg Pfirsiche, 82 mg B/kg Birnen [17] oder 19 mg B/l Wein [18].

Frau Sczielasko und Herrn Prunnbauer schulden wir Dank für das Ausarbeiten und Prüfen der Azomethin-H- bzw. der emissionsspektralanalytischen Methode. Herrn Winkler danken wir für die Probennahme, Fr. Humme, Frau Pollok, Fr. Wipplinger und Herrn Neis für die gewissenhafte Ausführung der zahlreichen colorimetrischen Analysen.

#### Schrifttum

1. F. J. Brinkmann u. K. Dekker, *H<sub>2</sub>O* **3** (1972) 525.
2. T. Heikkinen, *Diss. Abstr. B* **20** (1960) 3909.
3. IVA-Report 33, Boron from the Standpoint of Environment, Acad. Eng. Sci., Stockholm 1970.
4. H. Senften, Borsäure in Trink- und Mineralwässern, Inauguraldissertation der Philosophisch-naturwissenschaftlichen Fakultät der Universität Bern, 1972.
5. A. Waggot, *Water Res.* **3** (1969) 749.
6. W. Fresenius u. G. Jander: *Handbuch der Analytischen Chemie*. Teil III, Bd. III a α 1, Springer Verlag, Berlin/Heidelberg/New York 1971.
7. O. G. Koch u. G. A. Koch-Dedic: *Handbuch der Spurenanalyse*. 2. Aufl., Springer Verlag, Berlin/Heidelberg/New York 1974.
8. Standard Methods for the Examination of Water and Wastewater (13th Edit.), American Public Health Association, Washington 1971, S. 69.
9. R. Capelle, *Anal. Chim. Acta* **24** (1961) 555.
10. R. Capelle, *Anal. Chim. Acta* **25** (1961) 59.
11. A. Hofer, E. Brosche u. R. Heidinger, *Z. Anal. Chem.* **253** (1971) 117.
12. E. A. Agazzi, *Anal. Chem.* **39** (1967) 232.
13. D. Dyrssen, L. Uppström u. M. Zangen, *Anal. Chim. Acta* **46** (1969) 55.
14. A. A. Levinson, *Water Res.* **5** (1971) 41.
15. T. S. Chacatzirjan, *Gig. Sanit.* **35** (1970) 93.
16. J. Ploquin, *Bull. Soc. Sci. Hyg. Aliment.* **55** (1967) 70.
17. D. Schlettwein-Gsell u. S. Mommsen-Straub, Spurenelemente in Lebensmitteln, Intern. Vitaminforsch., *Beih.* **13** (1973).
18. R. Garcia-Olmedo, A. Carballido u. J. M. Collantes, *An. Bromatol. (Madrid)* **19** (1962) 11.
19. H. Kaiser u. H. Specker, *Z. Anal. Chem.* **149** (1956) 46.
20. H. Kaiser, *Z. Anal. Chem.* **209** (1965) 1.

## Technischer Einsatz von Borverbindungen

Von Alfred Graf von Matuschka\*

Aus der Elektroschmelzwerk Kempten GmbH

Die technischen Anwendungen von Borverbindungen wie Borcarbid, Borhalogenide, Bornitrid, Titandiborid, Zirkoniumdiborid, Calciumhexaborid und Europiumhexaborid werden beschrieben. Borcarbid findet wegen seiner hohen Härte als Körnung und als Sinterkörper bei Schleif- und Läppvorgängen Anwendung, wegen seines hohen Einfangquerschnitts für Neutronen dient es in Kernkraftwerken als Neutronenabsorber, als Steuer-, Regel- und Abschirmmaterial. Borcarbid wird in gesinterter Form u. a. als Düse, Reibschale und Panzerplatte angewendet. Als Borlietant findet es in Boriermitteln bei der Erzeugung extrem harter und verschleißfester Oberflächenschichten Verwendung. Borhalogenide dienen zum Dotieren von Halbleitermaterial und als Rohmaterial für die Herstellung von Borfäden. Zunehmende Bedeutung erlangt Bornitrid z. B. als Hochtemperaturwerkstoff, als elektrisches Isolations-, als Tiegelmateriale, als Neutronenabsorber und als Wafer. Metallboride werden eingesetzt z. B. als Hochtemperaturwerkstoff, als Elektrodenmaterial, als Desoxidations- und Flußmittel und als Absorberwerkstoff in schnellen Reaktoren. Viele Borverbindungen finden in Verbundsinterkörpern Anwendung, z. B. als Thermoelementenschutzrohr oder als Verdampfer bei der Hochvakuummetallisierung.

The technical applications of boron compounds such as boron carbide, boron halides, boron nitride, titanium boride, zirconium boride, calcium hexaboride and europium hexaboride will be described in the following. Boron carbide is used in grits and in sintered form for grinding and lapping because of its great hardness; because of its high absorption cross section, it is used as a neutron absorber in atomic power stations, and as control and shield material. Sintered boron carbide is used for example in the form of nozzles, mortars or armor plates. As a source of boron, it is used in boriding compounds to produce extremely hard and wear-resistant surface layers. Boron halides are used for doping semiconductors and as raw material for the production of boron threads. Boron nitride is becoming more important for example as high temperature material, as electrical insulating and crucible material, as a neutron absorber and in the form of wafers. Metal borides are employed e. g. as high temperature material, as electrode material, as a deoxidizing and fluxing agent and as an absorber in fast breeding reactors. Many boron compounds are used in compound sinter parts, for example as thermocouple shield tubes or as evaporation boats in high vacuum metallization.

### 1. Einleitung

Eine Reihe von teilweise sehr refraktären Borverbindungen hat bis heute in der Technik die verschiedensten Anwendungen gefunden. Da es den Rahmen dieser Arbeit sprengen würde, über alle zu berichten, soll genauer nur auf Borcarbid, Bornitrid, Calciumhexaborid, Titandiborid, Zirkoniumdiborid, Europiumhexaborid, die Borhalogenide und den damit zusammenhängenden Borfäden eingegangen werden. Die

wichtigste Verbindung dürfte das Borcarbid sein, welches neben seiner technischen Anwendung zugleich Bedeutung hat als Ausgangsmaterial für andere Borverbindungen.

Bor-Sauerstoff-Verbindungen wie Borax, Borsäure, Perborate u. a. werden aus den erwähnten Gründen nicht besprochen.

\* Chem. Ing. Alfred Graf von Matuschka, Elektroschmelzwerk Kempten GmbH, 8000 München 2, Herzog-Wilhelm-Straße 16.

---













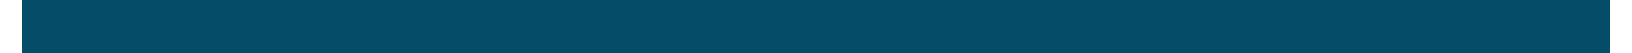

Supplement: MOESM1 [file 10661_2009_923_MOESM1_ESM.pdf]
